# Supplementary material for: Effect of Dexamethasone on the Incidence and Outcome of COVID-19 Associated Pulmonary Aspergillosis (CAPA) in Critically Ill Patients during First- and Second Pandemic Wave—A Single Center Experience
Source: MDPI journal article supplement (doi:10.3390/diagnostics12123049), 2022-12-05
Supplement: s1 [file s1]

## Supplementary Material

Table S1: Specific treatment for patients with COVID-19

|                   | <b>DEXA<br/>(n=169)</b> | <b>Non-DEXA<br/>(n=62)</b> |
|-------------------|-------------------------|----------------------------|
| Remdesivir        | 136                     | 13                         |
| Hydroxychloroquin | 0                       | 21                         |
| Plasma Exchange   | 0                       | 8                          |
| Sarilumab         | 0                       | 3                          |
